# Supplementary material for: Behaviour during transportation predicts stress response and lower airway contamination in horses
Source: PLoS One. 2018 Mar 22;13(3):e0194272. doi: 10.1371/journal.pone.0194272 (PMC5863983; doi:10.1371/journal.pone.0194272)
Supplement: S5 Table — (DOCX) [file pone.0194272.s005.docx]

**S5 Table. Effect of transportation on heart rate (HR), respiratory rate (RR), rectal temperature (RT) and body weight (BW)**

| Parameter | Preloading | Unloading | 12h AJ | 24h AJ | 5d AJ | SE | P value |
| --- | --- | --- | --- | --- | --- | --- | --- |
| HR (beat/min) | 34.7A | 43.3B | 36.4A | 36.4A | 34.7A | 1.1 | <0.001 |
| RR (breath/min) | 13.2a | 18.9Bb | 13.5a | 12.1A | 11.1A | 1.6 | 0.0045 |
| RT (˚C) | 37.5A | 38.0B | 37.5A | 37.5A | 37.3A | 0.1 | <0.001 |
| Body weight (kg) | 444.0A | 431.2Ba | . | 437.4Bb | 442.9A | 15.8 | <0.001 |

Effect of transportation on heart rate (HR), respiratory rate (RR), rectal temperature (RT) and body weight (BW) at preloading, unloading, 12 and 24 hours after journey (AJ), and at 5 days AJ. Data are expressed as the least square mean and standard error (SE), with P value determined by linear mixed model and Tukey post-hoc testing. Means with different superscripts differ significantly (A, B: P<0.001; a, b: P<0.05)
